# Supplementary material
Source: PubMed Central journal article supplement (PMC7045971)
Supplement: NIHMS1545009-supplement-1.pdf [file NIHMS1545009-supplement-1.pdf]

Supplemental Table A. Descriptive and clinical characteristics of the RYGB group only.

| Teen-LABS Baseline and Post-surgical Follow-up Time Points for RYGB Group |              |              |              |              |              |              |
|---------------------------------------------------------------------------|--------------|--------------|--------------|--------------|--------------|--------------|
|                                                                           | pre-op       | 1-year       | 2-year       | 3-year       | 4-year       | 5-year       |
| <b>n</b>                                                                  | 154          | 134          | 121          | 121          | 118          | 121          |
| <b>Age (yr)</b>                                                           | 17 (1.5)     | 18.2 (1.5)   | 19.3 (1.4)   | 20.1 (1.4)   | 21.2 (1.4)   | 22.2 (1.5)   |
| <b>Sex (male) (%)</b>                                                     | 23%          | 22%          | 18%          | 22%          | 19%          | 21%          |
| <b>Race</b>                                                               |              |              |              |              |              |              |
| -White (%)                                                                | 73%          | 72%          | 71%          | 73%          | 72%          | 73%          |
| -Black (%)                                                                | 23%          | 23%          | 24%          | 22%          | 23%          | 23%          |
| -Other (%)                                                                | 4%           | 5%           | 5%           | 5%           | 5%           | 4%           |
| <b>Height (cm)</b>                                                        | 167.7 (8.3)  | 167.7 (8.6)  | 167.9 (8.5)  | 167.9 (8.9)  | 168.4 (8.7)  | 167.9 (9.4)  |
| <b>Weight (kg)</b>                                                        | 151.4 (29.6) | 106.3 (27.1) | 106.3 (29.4) | 109.8 (31.9) | 112.5 (34.7) | 114.1 (31.6) |
| <b>BMI (kg/m<sup>2</sup>)</b>                                             | 53.8 (9.6)   | 37.8 (9.3)   | 37.8 (10.4)  | 39.1 (11.3)  | 39.7 (12)    | 40.6 (11.2)  |
| <b>SBP (mmHg)</b>                                                         | 127 (13)     | 117 (13)     | 117 (12)     | 118 (14)     | 118 (15)     | 120 (12)     |
| <b>TC (mg/dL)</b>                                                         | 159 (30)     | 145 (29)     | 149 (28)     | 149 (27)     | 154 (32)     | 153 (29)     |
| <b>HDL-c (mg/dL)</b>                                                      | 38 (9)       | 49 (10)      | 53 (13)      | 54 (15)      | 56 (16)      | 55 (15)      |
| <b>Smoking (%)</b>                                                        | 1.3%         | 3.0%         | 5.0%         | 7.4%         | 5.9%         | 7.4%         |
| <b>Diabetes (%)</b>                                                       | 14.9%        | 3.0%         | 1.7%         | 0.8%         | 3.4%         | 2.5%         |
| <b>Anti-HTN Meds (%)</b>                                                  | 22.7%        | 8.2%         | 5.8%         | 6.6%         | 6.8%         | 5.0%         |

Data are presented as mean (SD) and percentages.

Abbreviations (in order of appearance): pre-op = Before Surgery; BMI = body mass index; SBP = systolic blood pressure; TC = total cholesterol; HDL-c = high-density lipoprotein cholesterol; ant-HTN meds = prescribed anti-hypertension medications.

Supplemental Table B. Descriptive and clinical characteristics of the VSG Group only.

| Teen-LABS Baseline and Post-surgical Follow-up Time Points for VSG Group |              |              |             |              |              |              |
|--------------------------------------------------------------------------|--------------|--------------|-------------|--------------|--------------|--------------|
|                                                                          | pre-op       | 1-year       | 2-year      | 3-year       | 4-year       | 5-year       |
| <b>n</b>                                                                 | 61           | 47           | 47          | 41           | 48           | 37           |
| <b>Age (yr)</b>                                                          | 16.9 (1.6)   | 18.1 (1.5)   | 19.2 (1.6)  | 20.3 (1.6)   | 21.1 (1.6)   | 21.7 (1.7)   |
| <b>Sex (male) (%)</b>                                                    | 31%          | 36%          | 36%         | 29%          | 35%          | 38%          |
| <b>Race</b>                                                              |              |              |             |              |              |              |
| -White (%)                                                               | 69%          | 70%          | 64%         | 61%          | 69%          | 70%          |
| -Black (%)                                                               | 23%          | 24%          | 28%         | 29%          | 23%          | 19%          |
| -Other (%)                                                               | 8%           | 6%           | 8%          | 10%          | 8%           | 11%          |
| <b>Height (cm)</b>                                                       | 169.5 (9.2)  | 169.4 (10.4) | 171.3 (9.7) | 168.8 (11.3) | 169.7 (10.1) | 169.6 (11.7) |
| <b>Weight (kg)</b>                                                       | 146.3 (32.5) | 100.5 (26.6) | 103.3 (27)  | 104.6 (31.2) | 108.9 (32.2) | 113.2 (33.4) |
| <b>BMI (kg/m<sup>2</sup>)</b>                                            | 50.6 (8.5)   | 34.8 (7.5)   | 35.1 (8)    | 36.5 (9.6)   | 37.6 (9.6)   | 39.2 (10.2)  |
| <b>SBP (mmHg)</b>                                                        | 123 (13.8)   | 116 (13.2)   | 122 (15.4)  | 119 (13.1)   | 122 (12.8)   | 128 (16.8)   |
| <b>TC (mg/dL)</b>                                                        | 152 (30.4)   | 154 (31.7)   | 153 (30.8)  | 156 (30.7)   | 160 (42.1)   | 160 (28.6)   |
| <b>HDL-c (mg/dL)</b>                                                     | 37 (8.5)     | 47 (12.3)    | 51 (10.8)   | 51 (11.7)    | 53 (12.8)    | 53 (13.8)    |
| <b>Smoking (%)</b>                                                       | 3.3%         | 4.3%         | 10.6%       | 12.2%        | 8.3%         | 21.6%        |
| <b>Diabetes (%)</b>                                                      | 9.8%         | 0.0%         | 2.1%        | 0.0%         | 0.0%         | 2.7%         |
| <b>Anti-HTN Meds (%)</b>                                                 | 23.0%        | 8.5%         | 2.1%        | 2.4%         | 4.2%         | 5.4%         |

Data are presented as mean (SD) and percentages.

Abbreviations (in order of appearance): pre-op = Before Surgery; BMI = body mass index; SBP = systolic blood pressure; TC = total cholesterol; HDL-c = high-density lipoprotein cholesterol; ant-HTN meds = prescribed anti-hypertension medications.

**Supplemental Table C.**

| <b>Risk Level</b> | <b>TL Pre-op (n=215)</b> |       | <b>TL 1-year (n=181)</b> |        | <b>TL 2-year (n=168)</b> |        | <b>TL 3-year (n=162)</b> |        | <b>TL 4-year (n=166)</b> |        | <b>TL 5-year (n=158)</b> |        |
|-------------------|--------------------------|-------|--------------------------|--------|--------------------------|--------|--------------------------|--------|--------------------------|--------|--------------------------|--------|
|                   | <i>n</i>                 | %     | <i>n</i>                 | %      | <i>n</i>                 | %      | <i>n</i>                 | %      | <i>n</i>                 | %      | <i>n</i>                 | %      |
| <b>&gt;5%</b>     | 113                      | 52.6% | 40                       | 22.10% | 36                       | 21.40% | 38                       | 23.50% | 44                       | 26.50% | 53                       | 33.50% |
| <b>&gt;10%</b>    | 48                       | 22.3% | 8                        | 4.40%  | 6                        | 3.60%  | 7                        | 4.30%  | 9                        | 5.40%  | 11                       | 7.00%  |
| <b>&gt;15%</b>    | 23                       | 10.7% | 3                        | 1.70%  | 2                        | 1.20%  | 3                        | 1.90%  | 2                        | 1.20%  | 3                        | 1.90%  |
| <b>&gt;20%</b>    | 12                       | 5.6%  | 2                        | 1.10%  | 1                        | 0.60%  | 1                        | 0.60%  | 1                        | 0.60%  | 2                        | 1.30%  |

**Supplemental Table D. Cost-effectiveness Models of Bariatric Surgery for Reducing Cardiovascular Events.**

| <b>Groups</b>            | <b>Cost Excluding Surgery (\$)</b> | <b>Cost Including Surgery (\$)</b> | <b>QALY</b> | <b>ICER (\$/QALY)</b> |
|--------------------------|------------------------------------|------------------------------------|-------------|-----------------------|
| <b>Control</b>           | 8,298.14                           | 8,298.14                           | 16.8        | 13,432.64             |
| <b>Bariatric Surgery</b> | 5,179.48                           | 29,855.07                          | 18.5        |                       |

**Supplemental Table E.**Probability Estimates

| <b>Probability of Cardiovascular Events</b>           |             |               |                  |
|-------------------------------------------------------|-------------|---------------|------------------|
|                                                       | <b>Male</b> | <b>Female</b> | <b>Reference</b> |
| MI                                                    | 0.31        | 0.16          | [1]              |
| Angina                                                | 0.13        | 0.055         |                  |
| Heart Failure                                         | 0.23        | 0.30          |                  |
| Stroke                                                | 0.18        | 0.11          |                  |
| PAD                                                   | 0.19        | 0.35          |                  |
| CA                                                    | 0.019       | 0.035         |                  |
| <b>Probability of Dying from Cardiovascular Event</b> |             |               |                  |
| MI                                                    | 0.16        | 0.17          | [2]              |
| Heart Failure                                         | 0.059       | 0.066         |                  |
| Stroke                                                | 0.14        | 0.18          |                  |
| CA                                                    | 0.836       | 0.836         |                  |
| <b>Other Model Inputs</b>                             |             |               |                  |
| CABG given MI                                         |             | 0.082         | [3]              |
| PTCA given MI                                         |             | 0.3           |                  |
| CABG given Angina                                     |             | 0.2           |                  |
| PTCA given Angina                                     |             | 0.3           |                  |

## Costs Estimates:

|                         | <b>Cost, 2015 \$</b> | <b>Reference</b> |
|-------------------------|----------------------|------------------|
| MI, year 1              | 63443.22             | [4]              |
| MI, year 2+             | 10173.78             |                  |
| MI, fatal               | 17604.06             |                  |
| Angina, year 1          | 29721.15             | [4]              |
| Angina, year 2+         | 2800.65              |                  |
| Heart Failure, year 1   | 46985.51             | [5]              |
| Heart Failure, year 2+  | 18129.80             |                  |
| Heart Failure, fatal    |                      |                  |
| Stroke, year 1          | 49298.70             | [2,4,6-10]       |
| Stroke, year 2+         | 14494.32             |                  |
| Stroke, fatal           | 17994.54             |                  |
| PAD, year 1             | 19127.13             | [11]             |
| PAD, year 2+            | 7670.85              | [12]             |
| Cardiac arrest, year 1  | 64586.34             | [4]              |
| Cardiac arrest, year 2+ | 3657.99              |                  |
| Cardiac arrest, fatal   | 17489.75             |                  |
| CABG                    | 37608.68             | [4]              |

|                                           |                    |     |
|-------------------------------------------|--------------------|-----|
| CABG, diff ref                            | 67407.08           | [5] |
| CABG, year 2+                             | 3489.28            | [5] |
|                                           |                    |     |
| PTCA                                      | 35436.75           | [4] |
| PTCA, diff ref                            | 37402.38           | [5] |
| PTCA, year 2+                             | 7828.17            | [5] |
|                                           |                    |     |
| Initial surgery (GB)                      | \$25,070.48        |     |
| Initial surgery (SG)                      | \$23,708.80        |     |
| <b>Initial surgery – weighted average</b> | <b>\$24,675.59</b> |     |

## Utilities Estimates

|                           | Utility | Reference |
|---------------------------|---------|-----------|
| Baseline                  | 0.72    | [16]      |
| Gain per unit of BMI lost | 0.0056  | [17]      |
|                           |         |           |
| MI, year 1                | 0.67    | [18]      |
| MI, year 2+               | 0.82    |           |
|                           |         |           |
| Angina, year 1            | 0.67    | [18]      |
| Angina, year 2+           | 0.82    |           |
|                           |         |           |
| Heart Failure, year 1     | 0.60    | [18]      |
| Heart Failure, year 2+    | 0.57    |           |
|                           |         |           |
| Stroke, year 1            | 0.33    | [18]      |
| Stroke, year 2+           | 0.52    |           |
|                           |         |           |
| PAD, year 1               | 0.67    | [19]      |
|                           |         |           |
| Cardiac arrest, year 1    | 0.39    | [20]      |
| Cardiac arrest, year 2+   | 0.75    |           |

1. National Heart, Lung, and Blood Institute, National Institutes of Health. Incidence and Prevalence: 2006 Chart Book on Cardiovascular and Lung Diseases. Bethesda, United States: National Institutes of Health (NIH), 2006.
2. Mozaffarian D, Benjamin EJ, Go AS, et al. Heart disease and stroke statistics--2015 update: a report from the American Heart Association. *Circulation*. 2015;131(4):e29-322.
3. Pandya A, Sy S, Cho S, Weinstein MC, Gaziano TA. Cost-effectiveness of 10-Year Risk Thresholds for Initiation of Statin Therapy for Primary Prevention of Cardiovascular Disease. *JAMA*. 2015;314(2):142-50.
4. O'Sullivan AK, Rubin J, Nyambose J, Kuznik A, Cohen DJ, Thompson D. Cost estimation of cardiovascular disease events in the US. *Pharmacoeconomics*. 2011;29(8):693-704.
5. Fox KM, Wang L, Gandra SR, Quek RGW, Li L, Baser O. Clinical and economic burden associated with cardiovascular events among patients with hyperlipidemia: a retrospective cohort study. *BMC Cardiovasc Disord*. 2016;16:13.
6. Andersen, K.K., et al., *Hemorrhagic and ischemic strokes compared: stroke severity, mortality, and risk factors*. *Stroke*, 2009. **40**(6): p. 2068-72.
7. Thijs, V. and K. Butcher, *Challenges and misconceptions in the aetiology and management of atrial fibrillation-related strokes*. *Eur J Intern Med*, 2015. **26**(7): p. 461-7.
8. Yong, J.H., et al., *Potential Cost-Effectiveness of Ambulatory Cardiac Rhythm Monitoring After Cryptogenic Stroke*. *Stroke*, 2016. **47**(9): p. 2380-5.
9. Shah, S.V. and B.F. Gage, *Cost-effectiveness of dabigatran for stroke prophylaxis in atrial fibrillation*. *Circulation*, 2011. **123**(22): p. 2562-70.
10. Coyle, D., et al., *Cost-effectiveness of new oral anticoagulants compared with warfarin in preventing stroke and other cardiovascular events in patients with atrial fibrillation*. *Value Health*, 2013. **16**(4): p. 498-506.
11. Chapman RH, Liu LZ, Girase PG, Straka RJ. Determining initial and follow-up costs of cardiovascular events in a US managed care population. *BMC Cardiovasc Disord*. 2011;11:11.
12. Margolis J, Barron JJ, Grochulski WD. Health care resources and costs for treating peripheral artery disease in a managed care population: results from analysis of administrative claims data. *J Manag Care Pharm*. 2005;11(9):727-34.
13. Inge TH, Courcoulas AP, Jenkins TM, et al. Weight loss and health status 3 years after bariatric surgery in adolescents. *N Engl J Med*. 2016;374(2):113-123.
14. Bairdain S, Samnaliev M. Cost-effectiveness of adolescent bariatric surgery. *Cureus*. 2015;7(2):e248.
15. Nguyen NT, Nguyen B, Gebhart A, Hohmann S. Changes in the makeup of bariatric surgery: A national increase in use of laparoscopic sleeve gastrectomy. *J Am Coll Surg*. 2013;216(2):252-257.
16. Karlsson J, Taft C, Rydén A, Sjöström L, Sullivan M. Ten-year trends in health-related quality of life after surgical and conventional treatment for severe obesity: the SOS intervention study. *Int J Obes (Lond)*. 2007;31(8):1248-61.
17. Hoerger TJ, Zhang P, Segel JE, Kahn HS, Barker LE, Couper S. Cost-effectiveness of bariatric surgery for severely obese adults with diabetes. *Diabetes Care*. 2010;33(9):1933-9.
18. Matza LS, Stewart KD, Gandra SR, et al. Acute and chronic impact of cardiovascular events on health state utilities. *BMC Health Serv Res*. 2015;15:173.
19. Fanari Z, Weintraub WS. Cost-effectiveness of medical, endovascular and surgical management of peripheral vascular disease. *Cardiovasc Revasc Med*. 2015;16(7):421-5.
20. Merchant RM, Becker LB, Abella BS, Asch DA, Groeneveld PW. Cost-effectiveness of therapeutic hypothermia after cardiac arrest. *Circ Cardiovasc Qual Outcomes*. 2009;2(5):421-8.
21. Sjöström L, Peltonen M, Jacobson P, et al. Bariatric surgery and long-term cardiovascular events. *JAMA*. 2012;307(1):56-65.

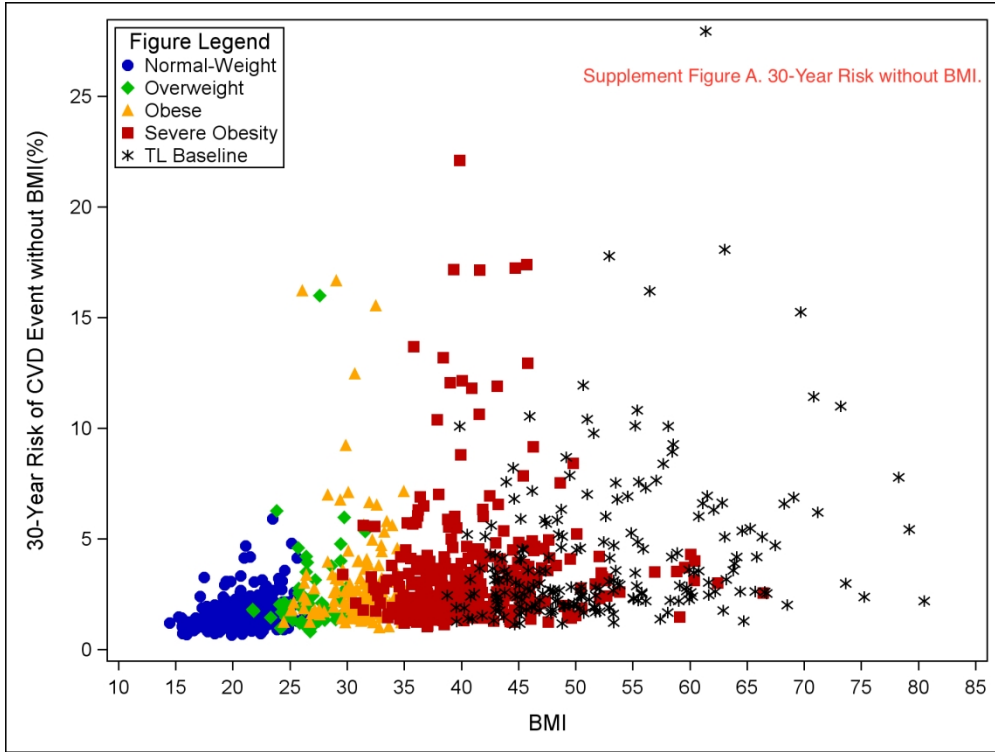

169x127mm (300 x 300 DPI)



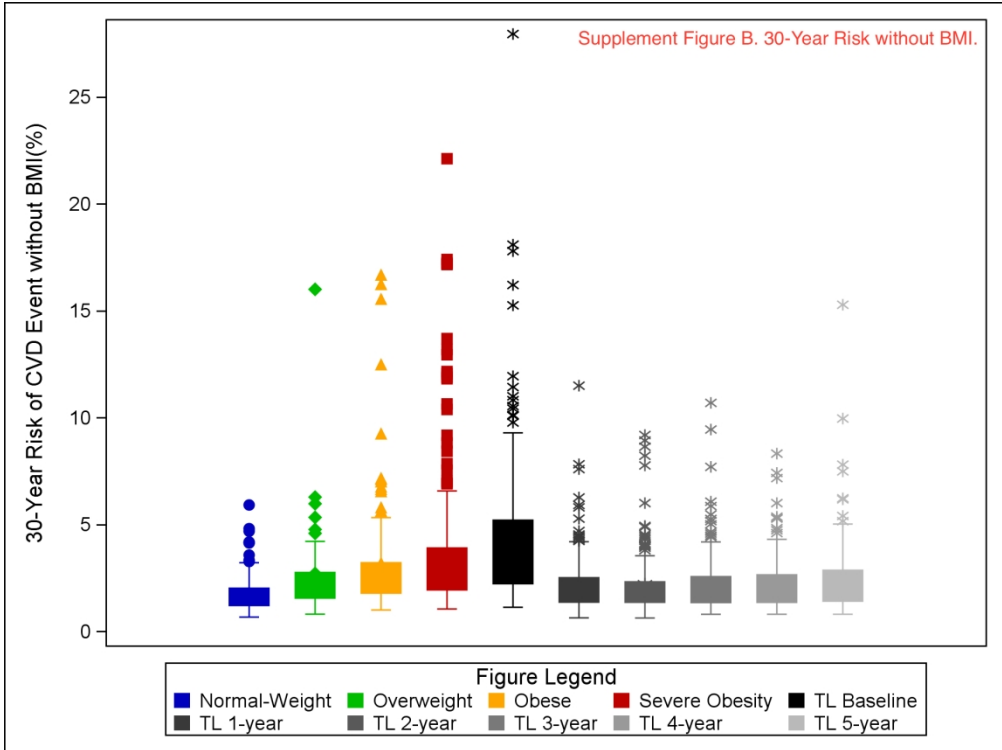

169x127mm (300 x 300 DPI)

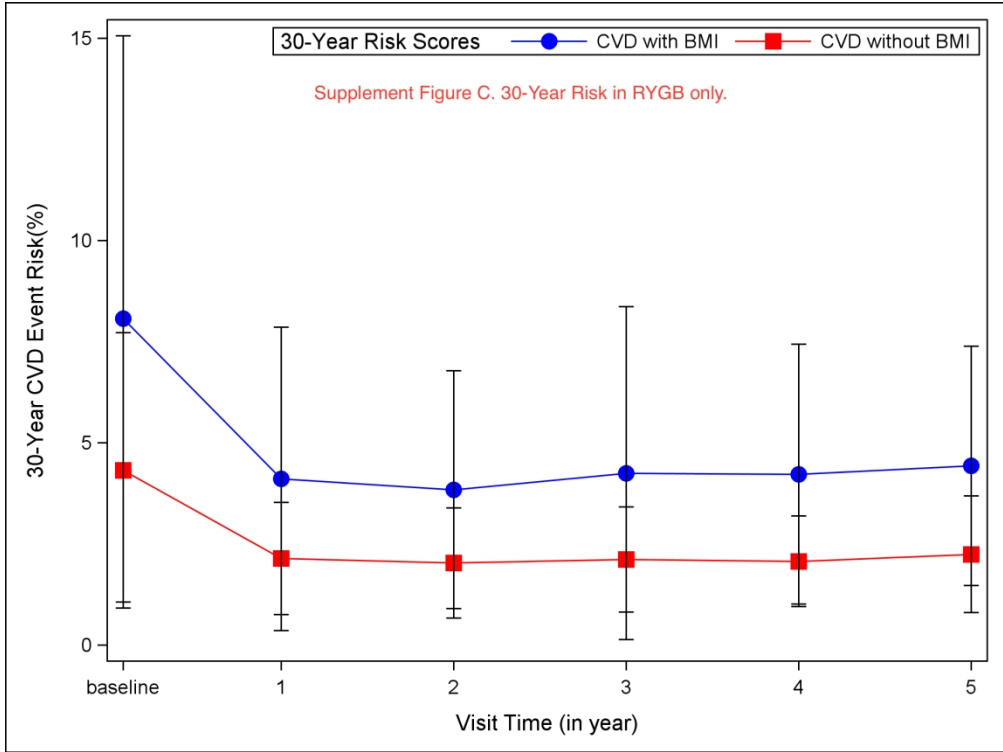

169x127mm (300 x 300 DPI)

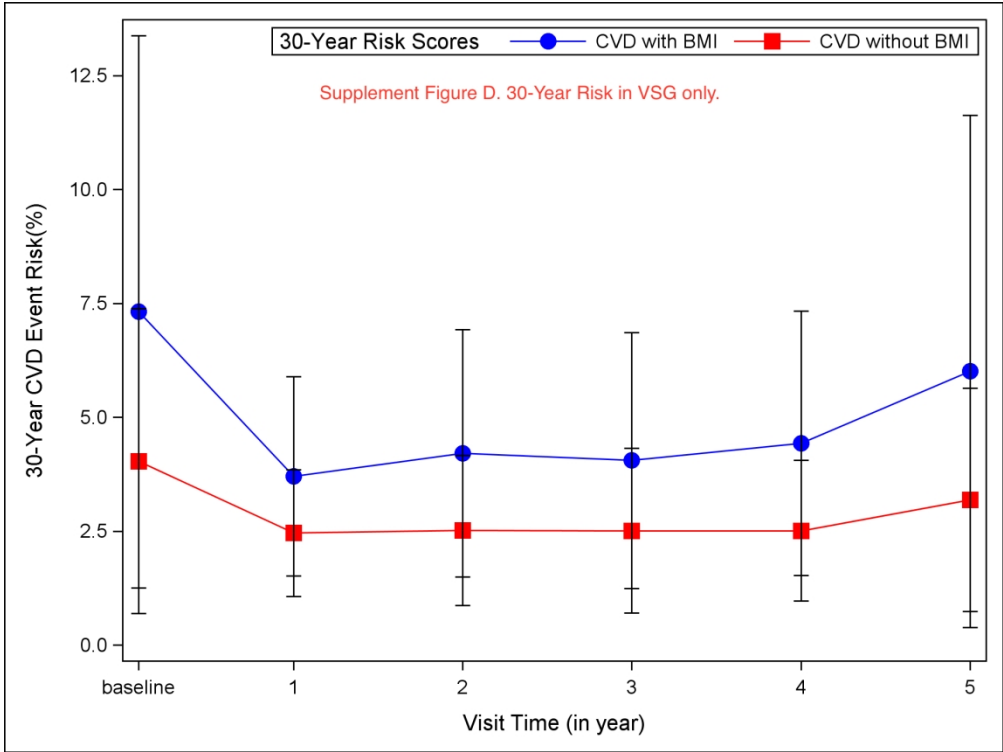

169x127mm (300 x 300 DPI)
